# Supplementary material
Source: PubMed Central journal article supplement (PMC5118677)
Supplement: jcav07p2124s1.pdf [file jcav07p2124s1.pdf]

**Supplementary Table 1. Primary antibodies**

---

| Antibodies    | Host   | Source            | Dilution  | Pretreatment |
|---------------|--------|-------------------|-----------|--------------|
| CC10          | Rabbit | Dr. Franco DeMayo | 1:100     | microwave    |
| Synaptophysin | Rabbit | Zymed             | 1:100     | microwave    |
| CGRP          | Rabbit | Sigma             | 1:3000    | microwave    |
| MASH1         | Mouse  | BD Biotechnology  | 1:20,1:50 | microwave    |
| PCNA          | Mouse  | DAKO              | 1:100     | microwave    |

---

Antibody sources: Zymed, South San Francisco, CA; Sigma, St. Louis, MO; BD Biotechnology Pharmingen, San Diego, CA; DAKO, Carpinteria, CA.
